# Supplementary material
Source: PubMed Central journal article supplement (PMC3730854)

# Supplemental Figure 1

**A**

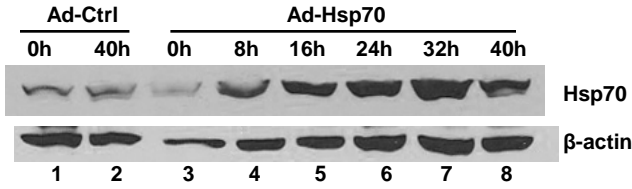

**B**

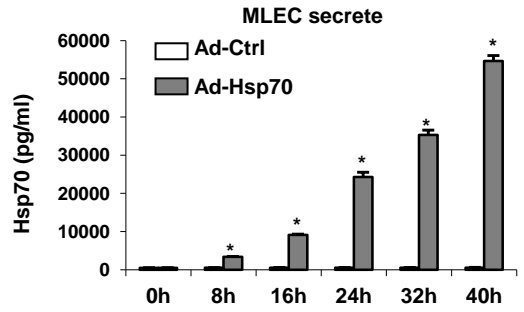

**C**

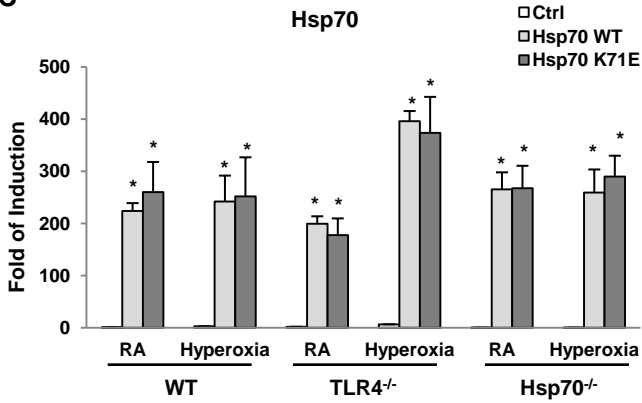

**D**

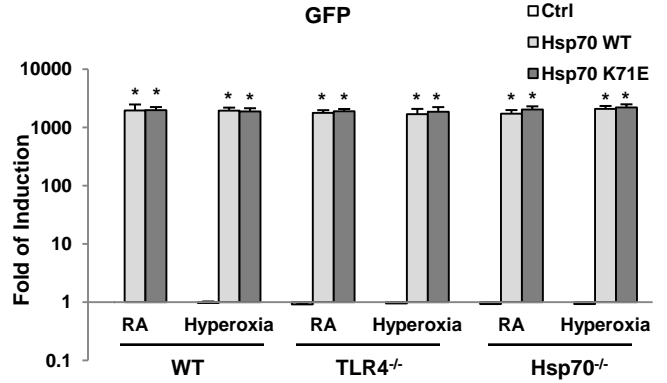

**E**

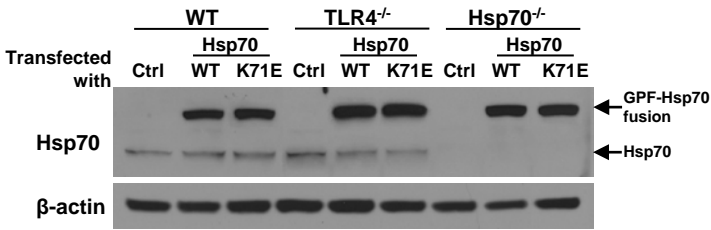

**F**

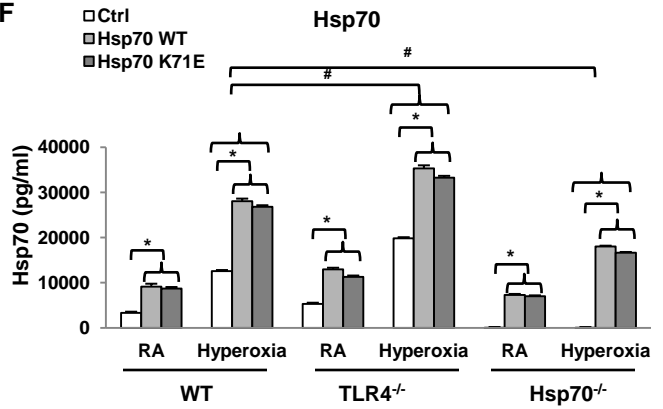

## Supplemental Figure 2

A

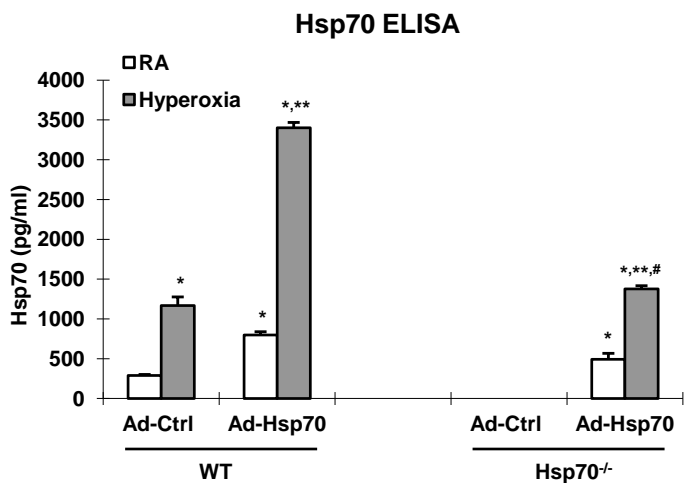

B

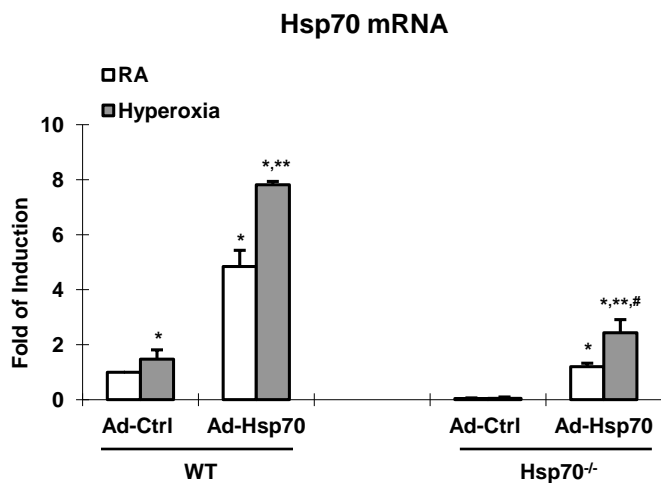

C

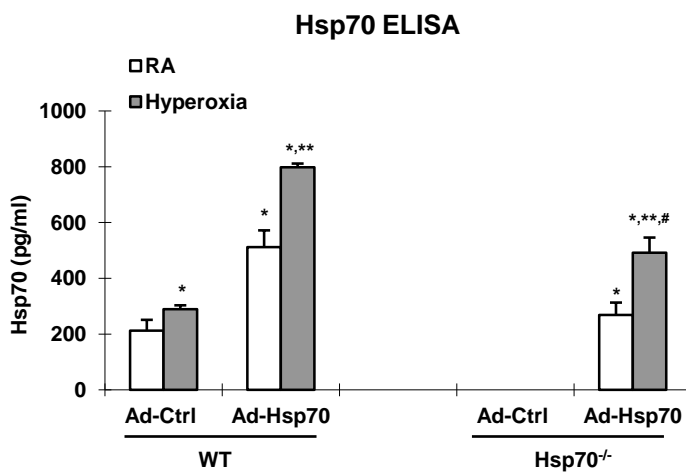

D

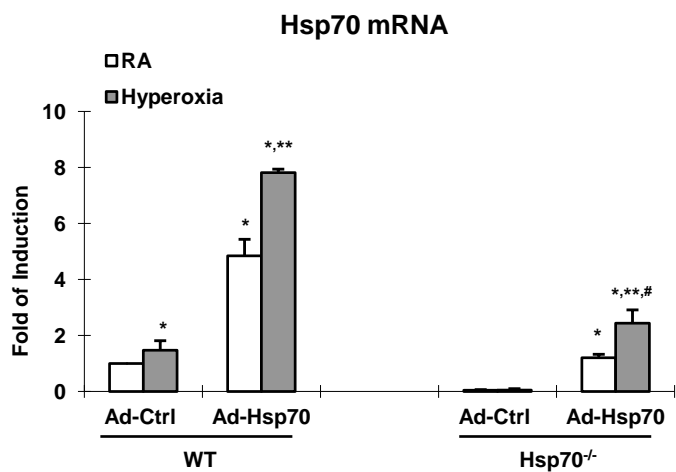

### Supplemental Figure 3

A

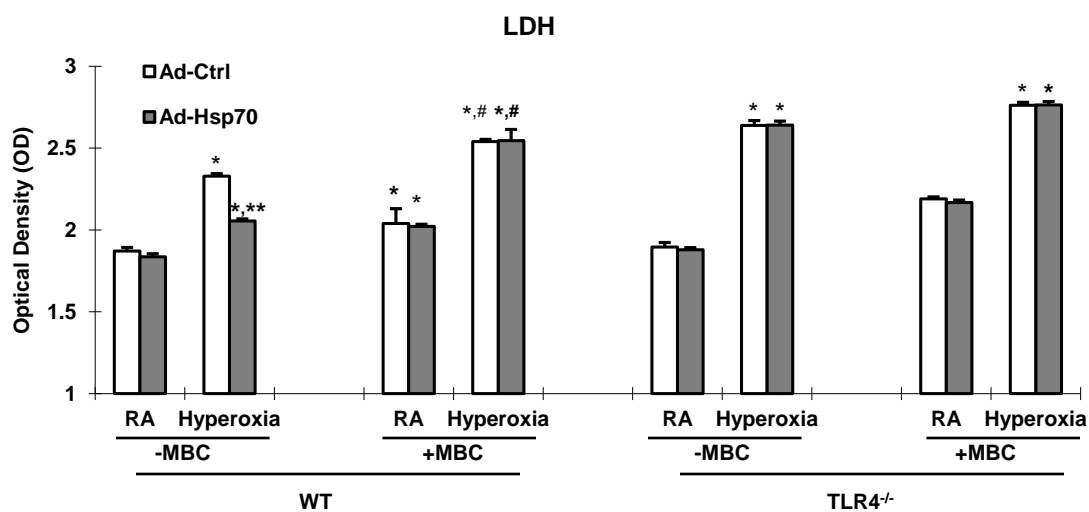

B

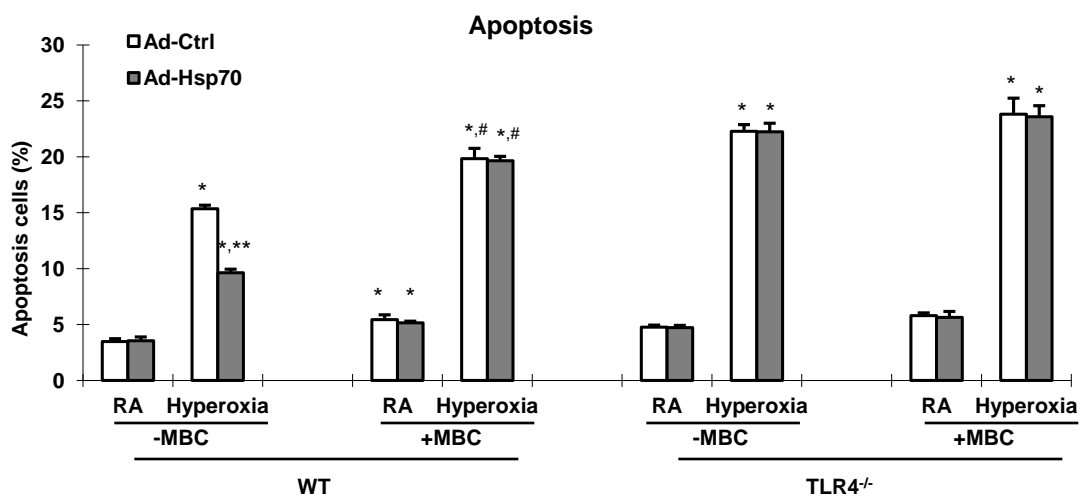

C

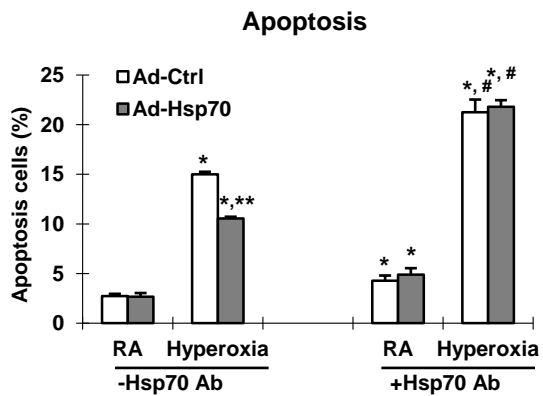

# Supplemental Figure 4

A

LDH

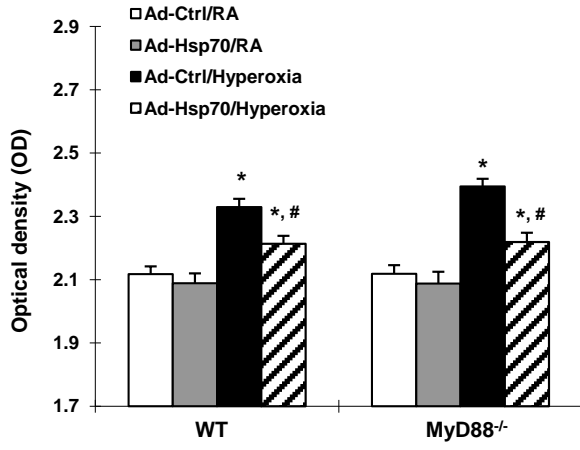

B

Apoptosis

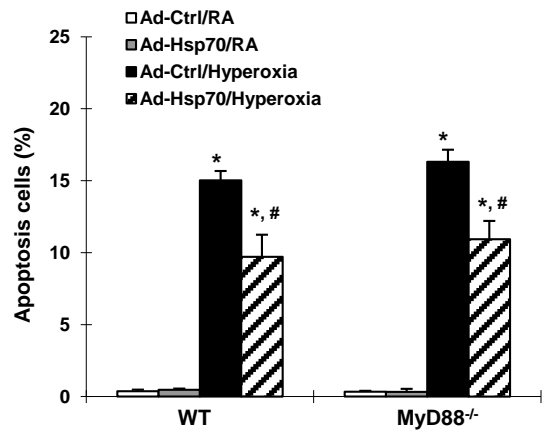

Supplement: NIHMS487737-supplement-2.pdf [file NIHMS487737-supplement-2.pdf]
